# Supplementary material for: Energetics and optical properties of carbon impurities in rutile TiO2
Source: Royal Society of Chemistry journal article supplement (doi:10.1039/d0ra02709j), 2020-01-01
Supplement: d0ra02709j1.pdf [file d0ra02709j1.pdf]

## Energetics and optical properties of carbon impurities in rutile $\text{TiO}_2$

Supparat Charoenphon,<sup>1</sup> Adisak Boonchun,<sup>1,2</sup> Daungruthai Jarukanont,<sup>1</sup> Jiraroj T-Thienprasert,<sup>1,2</sup>  
and Pakpoom Reunchan<sup>1,2</sup>

<sup>1</sup> Department of Physics, Faculty of Science, Kasetsart University, Bangkok 10900, Thailand

<sup>2</sup> Thailand Center of Excellence in Physics, Ministry of Higher Education, Science, Research and  
Innovation, 328 Si Ayutthaya Road, Bangkok 10400, Thailand

### A. Chemical potential diagram for equilibrium growth of $\text{TiO}_2$

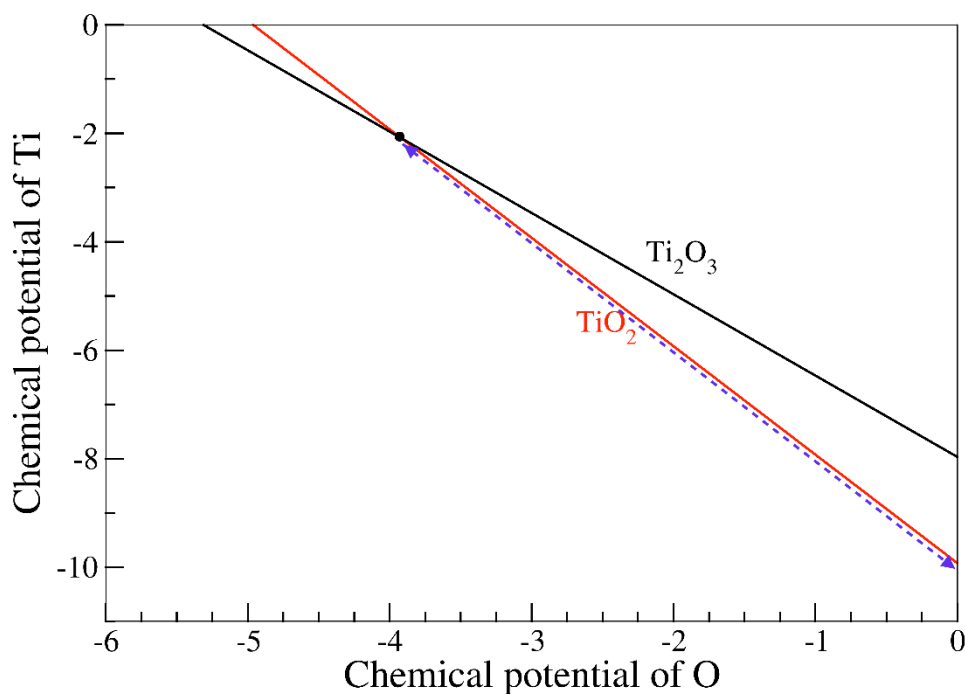

**Figure S1.** Chemical potential diagram associated with equilibrium growth of  $\text{TiO}_2$ . For stable growth of  $\text{TiO}_2$ , the chemical potentials of Ti and O lying on the dashed line are required.

## B. Crystal structure, band structure and Brillouin zone of rutile TiO<sub>2</sub>

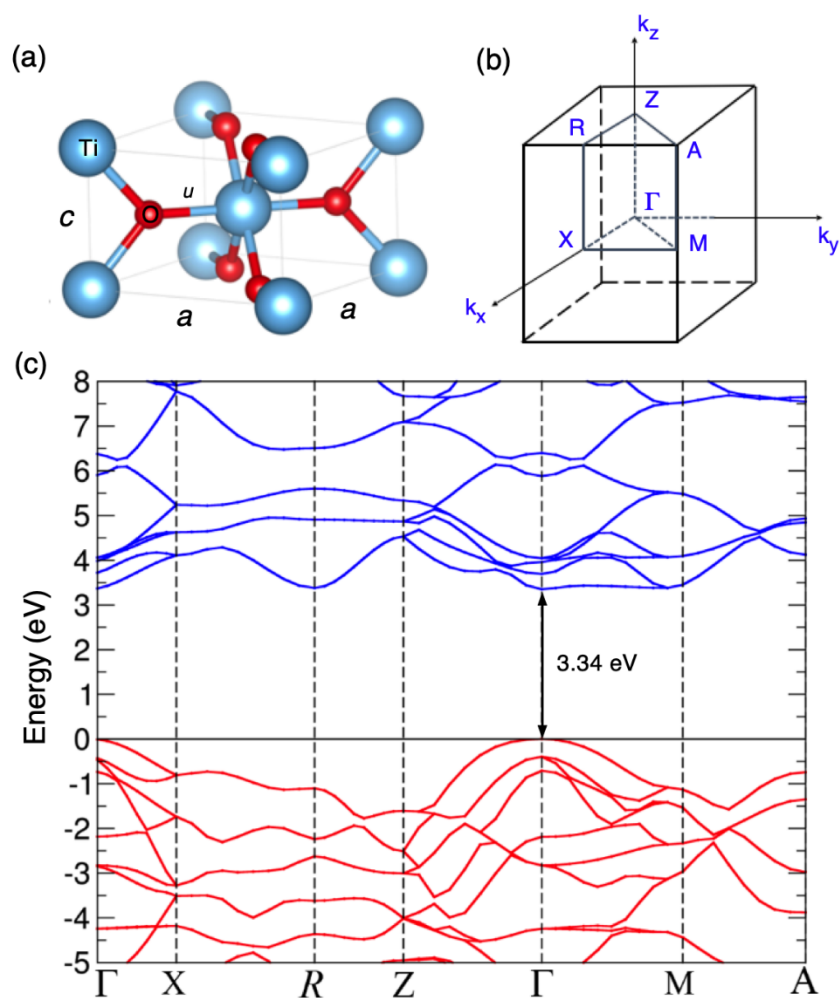

**Figure S2** (a) Crystal structure and lattice parameters of rutile TiO<sub>2</sub>. (b) The corresponding Brillouin zone. (c) The calculated electronic band structure using HSE functional.

### C. Density of states for the substitutional C on O site ( $C_O$ )

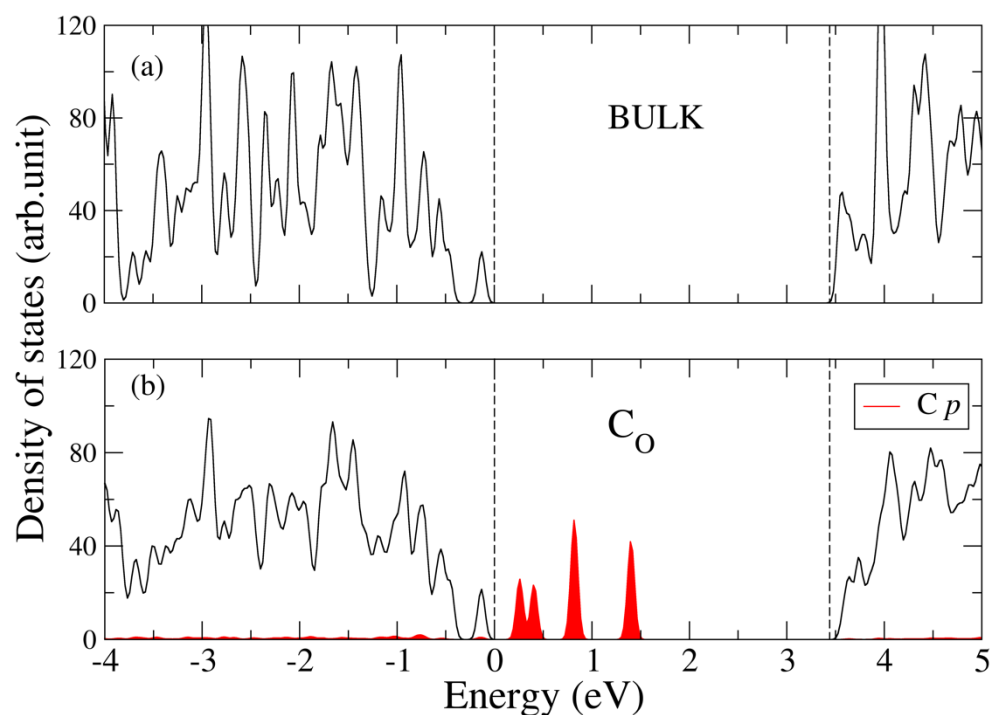

**Figure S3** Calculated density of states for (a) defect-free 72-atom supercell of rutile  $TiO_2$  and (b) the same supercell containing  $C_O$  in 2- charge state. The C 2p states are shown as the shaded area with 10 times multiplication of original projected DOS on the C atom for clarity. The dashed lines indicate valence band and conduction edges.
